# Supplementary material for: Charge transport in films of Geobacter sulfurreducens on graphite electrodes as a function of film thickness
Source: Royal Society of Chemistry journal article supplement (doi:10.1039/c4cp01023j), 2014-01-01
Supplement: c4cp01023j2.pdf [file c4cp01023j2.pdf]

Electronic Supplementary Information for PCCP

Charge transport in films of *Geobacter sulfurreducens* on graphite electrodes as a  
function of film thickness

Partha Sarathi Jana,<sup>a</sup> Krishna Katuri,<sup>a,b</sup> Paul Kavanagh,<sup>a</sup> Amit Kumar<sup>a,c</sup> and Dónal Leech<sup>\*a</sup>

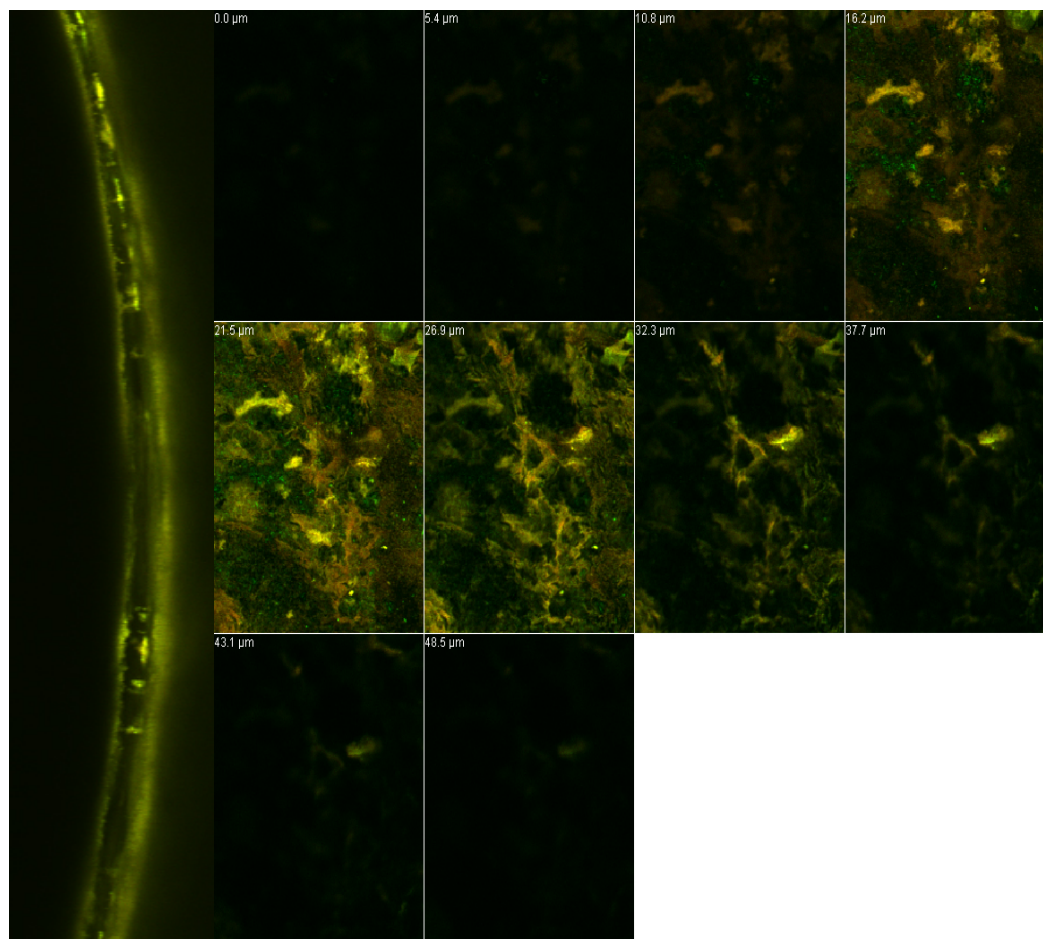

Figure S1. CLSM and z-stack images of an electrode sampled from the reactor after 79 hours  
(see figure 1 and 2).

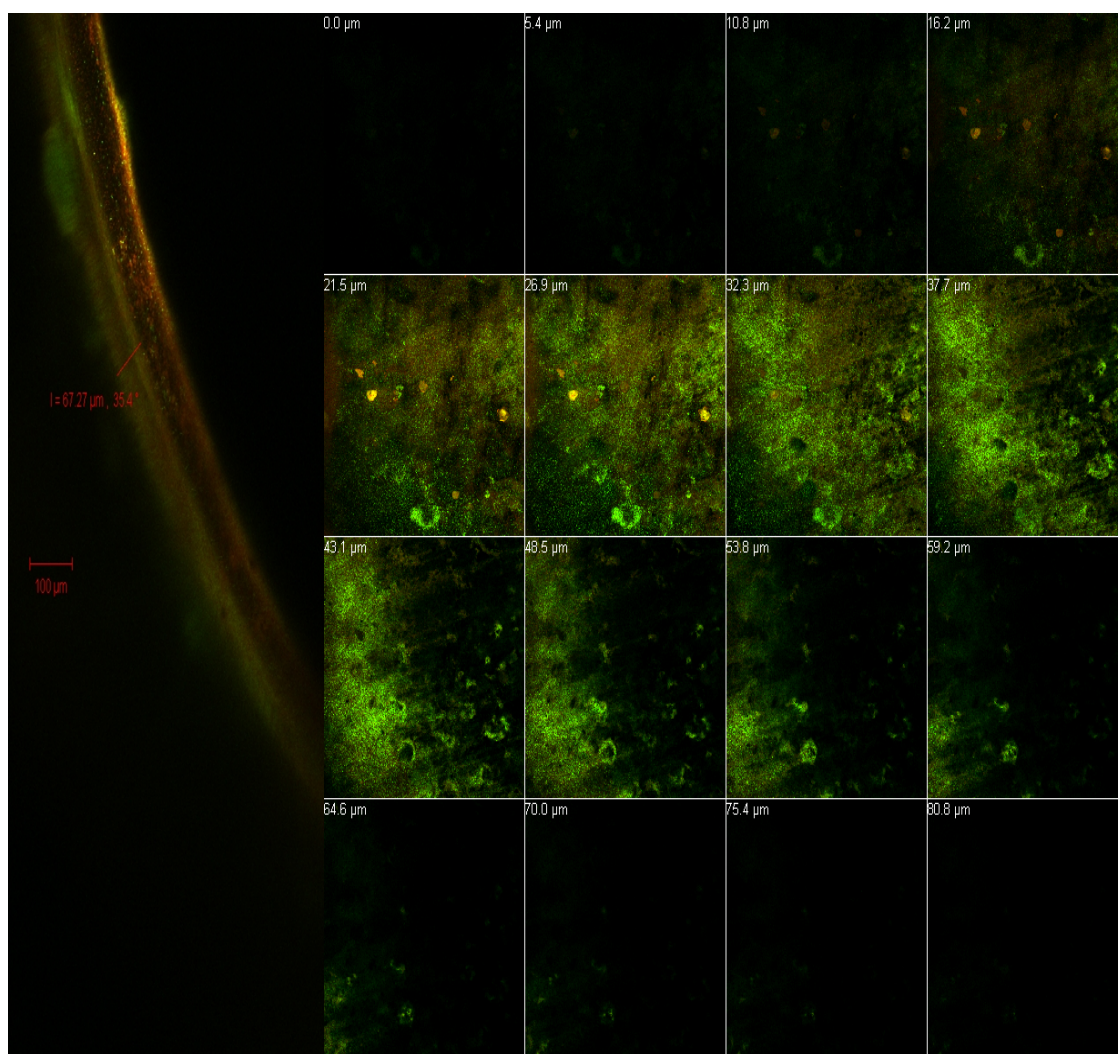

Figure S2. . CLSM and z-stack images of an electrode sampled from the reactor after 129 hours (see figure 1 and 2).

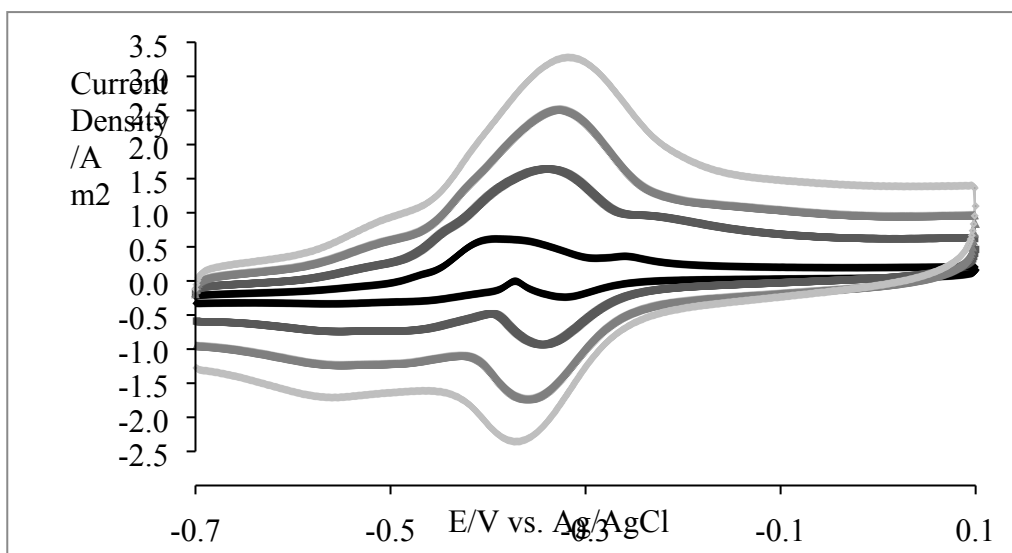

Figure S3. Cyclic voltammetry recorded at scan rates of 5, 20, 40, 60 mV s<sup>-1</sup> (from lowest to highest signals) under non-turnover conditions for an electrode sampled from the reactor after 79 h operation (see Materials and Methods and figure 1 and 2).
